# Supplementary material for: The Biosynthesized Zinc Oxide Nanoparticles’ Antiviral Activity in Combination with Pelargonium zonale Extract against the Human Corona 229E Virus
Source: MDPI journal article supplement (doi:10.3390/molecules27238362), 2022-11-30
Supplement: s1 [file s1]

**Supplementary data**  
(Manuscript Ref. No.: Molecules-2034916)

“The biosynthesized zinc oxide nanoparticles’ Antiviral activity in combination with *Pelargonium zonale* extract against the human corona 229E virus”.

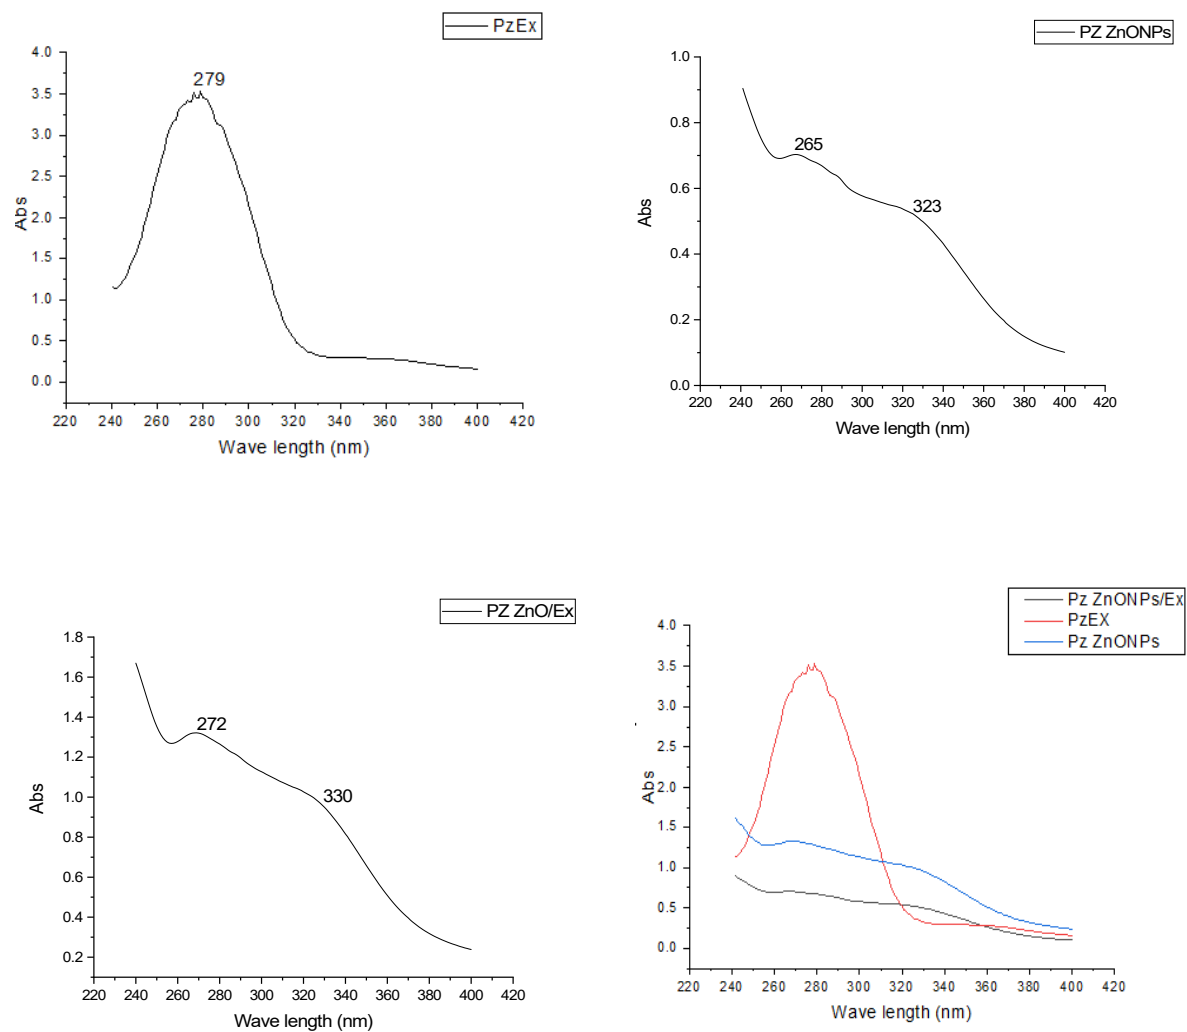

**Figure S1.** U.V analysis of *P. zonale* extract, PZ-ZnONPs, and PZ ZnONPs/Ex.

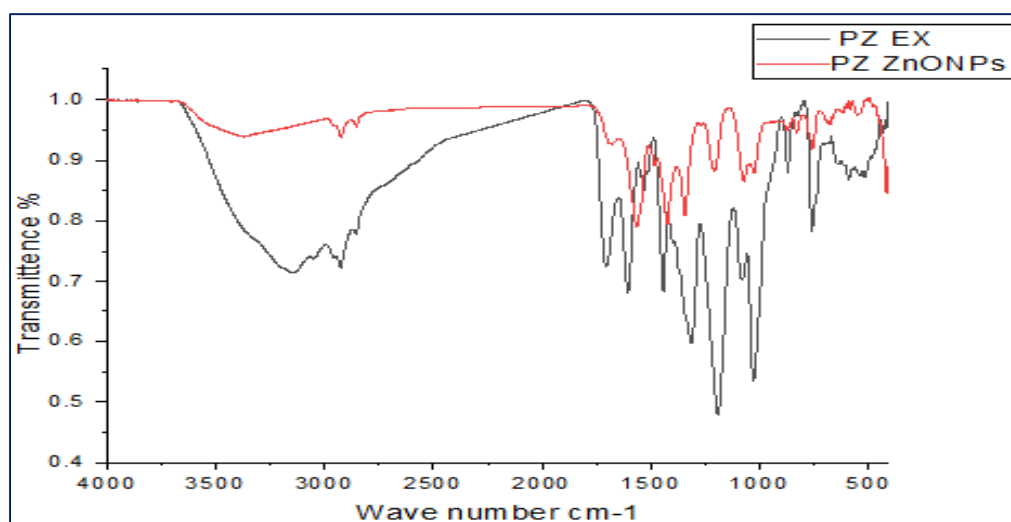

**Figure S2.** IR Spectrum of *P. zonale* extract and PZ/ZnONPs.
